# Supplementary material for: “My Friend with HIV Remains a Friend”: HIV/AIDS Stigma Reduction through Education in Secondary Schools—A Pilot Project in Buea, Cameroon
Source: PubMed Central journal article supplement — J Int Assoc Provid AIDS Care. 2020 Feb 10;19:2325958219900713. doi: 10.1177/2325958219900713 (PMC7011319; doi:10.1177/2325958219900713), 2020-02-10
Supplement: jacobijipactest1addmat.pdf [file jacobijipactest1addmat.pdf]

***A friend with HIV remains my friend a HIV / AIDS Antistigma project in Buea***

**Test I: Knowledge on HIV / AIDS Version 1**

**23.09.2009**

**Name:** \_\_\_\_\_ **Sex** \_\_\_\_ **Age** \_\_\_\_ **Grade:** \_\_\_\_\_

**School:** \_\_\_\_\_ **Duration of the test: 60 minutes**

**True or False?**

**T / F**

|                                                                                                   |  |
|---------------------------------------------------------------------------------------------------|--|
| 1. HIV is a bacterium?                                                                            |  |
| 2. HIV can be cured with traditional medicine (witchcraft)?                                       |  |
| 3. People living with HIV live as long as people without HIV                                      |  |
| 4. A virus can live by itself?                                                                    |  |
| 5. A person's physical appearance can tell you his/her HIV status (One sees if a person has HIV)? |  |
| 6. Certain cancers are particular common in HIV infection?                                        |  |
| 7. Malaria kills more people than HIV?                                                            |  |
| 8. HIV is a virus?                                                                                |  |
| 9. Condoms prevent the spread of HIV?                                                             |  |
| 10. ARVs are free of charge?                                                                      |  |
| 11. Most people with HIV live in Europe?                                                          |  |
| 12. One can get immunized against HIV?                                                            |  |
| 13. HIV originated from witchcraft?                                                               |  |
| 14. People with HIV can have sex?                                                                 |  |
| 15. 25% of the Cameroonians are infected with HIV?                                                |  |
| 16. People with HIV can live normal lifes?                                                        |  |
| 17. Caring for AIDS patients is dangerous compared to other diseases?                             |  |
| 18. HIV can be spread through eating certain foods?                                               |  |
| 19. Having HIV does not mean to get AIDS?                                                         |  |
| 20. HIV cannot be eliminated from the body?                                                       |  |
| 21. The highest incidence (Nr. of people with new HIV infection) is in Africa?                    |  |
| 22. Circumcision prevents the spread of HIV?                                                      |  |
| 23. Stigmatising HIV patients is a big problem?                                                   |  |
| 24. HIV can be spread through breast feeding?                                                     |  |
| 25. 10% of the Cameroonians are infected with HIV?                                                |  |
| 26. HIV patients can continue working in their jobs?                                              |  |
| 27. There is effective HIV/AIDS treatment today                                                   |  |

|                                                                                              |  |
|----------------------------------------------------------------------------------------------|--|
| 28. HIV kills immune cells?                                                                  |  |
| 29. HIV is a curable disease?                                                                |  |
| 30. Medication against HIV has to be taken lifelong?                                         |  |
| 31. The HIV test is safe, reliable and free of charge for pregnant women?                    |  |
| 32. People can get HIV by eating with the same fork?                                         |  |
| 33. HIV needs a living cell to survive?                                                      |  |
| 34. Mosquitoes can transmit HIV?                                                             |  |
| 35. Some food or drinks can prevent the spread of HIV?                                       |  |
| 36. People can get HIV by drinking from the same glass?                                      |  |
| 37. Tuberculosis and HIV cannot be present together in one patient?                          |  |
| 38. Only antiretroviral drugs can control the HIV infection?                                 |  |
| 39. Women with HIV can give birth to a child without HIV?                                    |  |
| 40. "ARV" stands for <b>African Research</b> foundation on HIV                               |  |
| 41. People can get HIV by kissing each other?                                                |  |
| 42. It is thought that HIV originated from apes?                                             |  |
| 43. Women can get infected more easily with HIV than men?                                    |  |
| 44. Drugs against HIV have always very serious side effects?                                 |  |
| 45. HIV can be spread by using the same toilet?                                              |  |
| 46. Stigmatisation is not a problem regarding HIV / AIDS?                                    |  |
| 47. "ARV" stands for " <b>Antiretroviral</b> "                                               |  |
| 48. In Cameroon more men than women are infected with HIV?                                   |  |
| 49. In mothers with HIV, the breast milk does not contain the virus?                         |  |
| 50. The rate of HIV infection in the Far North is lower than in the South W. Region?         |  |
| 51. In Africa, HIV is most often spread through heterosexual contacts?                       |  |
| 52. Education is the most important way to prevent the spread of HIV?                        |  |
| 53. HIV can be spread through contact of blood?                                              |  |
| 54. Weight loss, fever and loss of power can be signs of a HIV infection?                    |  |
| 55. Stigmatisation might prevent people from taking their HIV medication?                    |  |
| 56. Being faithful to one uninfected partner and condoms is the best protection against HIV? |  |

**OPEN Questions:**

- 57. What do the abbreviations "HIV" and "AIDS" stand for?
- 58. What is the difference between HIV and AIDS, how does one get infected?
- 59. What is Stigma? What is Discrimination?
- 60. Give three ways by which stigma can be reduced?

***Please write answers on the back of the page***
