# Supplementary material for: “My Friend with HIV Remains a Friend”: HIV/AIDS Stigma Reduction through Education in Secondary Schools—A Pilot Project in Buea, Cameroon
Source: PubMed Central journal article supplement — J Int Assoc Provid AIDS Care. 2020 Feb 10;19:2325958219900713. doi: 10.1177/2325958219900713 (PMC7011319; doi:10.1177/2325958219900713), 2020-02-10
Supplement: jacobijipactest2addmat.pdf [file jacobijipactest2addmat.pdf]

***A friend with HIV remains my friend a HIV / AIDS Antistigma project in Buea***

**Test II: Knowledge on HIV / AIDS Version 1**

**21.04.2010**

**Name:** \_\_\_\_\_ **Sex** \_\_\_\_ **Age** \_\_\_\_ **Grade:** \_\_\_\_\_

**School:** \_\_\_\_\_ **Duration of the test: 45 minutes**

**True or False?**

**T / F**

|                                                                                                   |  |
|---------------------------------------------------------------------------------------------------|--|
| 1. The HIV Virus can live forever in dried blood?                                                 |  |
| 2. HIV can be cured with traditional medicine (witchcraft)?                                       |  |
| 3. People living with HIV live as long as people without HIV?                                     |  |
| 4. A virus can live by itself?                                                                    |  |
| 5. A person's physical appearance can tell you his/her HIV status (One sees if a person has HIV)? |  |
| 6. HIV is a DNA Virus?                                                                            |  |
| 7. TB Joshua can cure people with HIV?                                                            |  |
| 8. Living and eating healthy does not influence the course of the HIV infection?                  |  |
| 9. Condoms prevent the spread of HIV?                                                             |  |
| 10. World Aids day is held on the 1.12. each year?                                                |  |
| 11. Most people with HIV live in Europe?                                                          |  |
| 12. One can get immunized against HIV?                                                            |  |
| 13. The HIV Virus was discovered in 2001?                                                         |  |
| 14. People with HIV can have sex?                                                                 |  |
| 15. On average 20.7 % of the Cameroonians are infected with HIV?                                  |  |
| 16. People with HIV can live normal lifes?                                                        |  |
| 17. Caring for AIDS patients is dangerous compared to other diseases?                             |  |
| 18. Condoms cannot prevent the spread of sexually transmitted diseases?                           |  |
| 19. Having HIV does not mean to develop AIDS?                                                     |  |
| 20. HIV cannot be eliminated from the body?                                                       |  |
| 21. The highest incidence (Nr. of people with new HIV infection) is in Africa?                    |  |
| 22. Sleeping in the same bed with an HIV patient: HIV will be contracted?                         |  |
| 23. Stigmatising HIV patients is a big problem?                                                   |  |
| 24. HIV can be spread through breast feeding?                                                     |  |
| 25. On average 5.5% of the Cameroonians are infected with HIV?                                    |  |
| 26. HIV patients can continue working in their jobs?                                              |  |
| 27. There is effective HIV / AIDS treatment today?                                                |  |

|                                                                                                    |  |
|----------------------------------------------------------------------------------------------------|--|
| 28. There is no difference between HIV and AIDS?                                                   |  |
| 29. HIV is a curable disease?                                                                      |  |
| 30. Medication against HIV has to be taken lifelong?                                               |  |
| 31. A child born by an HIV positive woman is always HIV positive?                                  |  |
| 32. People can get HIV by eating with the same fork?                                               |  |
| 33. HIV needs a living cell to survive?                                                            |  |
| 34. Mosquitoes can transmit HIV?                                                                   |  |
| 35. Sensitation programs on HIV increase the awareness and can prevent the spread of HIV?          |  |
| 36. People can get HIV by drinking from the same glass?                                            |  |
| 37. Tuberculosis and HIV cannot be present together in one patient?                                |  |
| 38. Only antiretroviral drugs can control the HIV infection?                                       |  |
| 39. Women with HIV can give birth to a child without HIV?                                          |  |
| 40. HIV is diagnosed by an antibody test?                                                          |  |
| 41. People can get HIV by kissing each other?                                                      |  |
| 42. It is thought that HIV originated from apes?                                                   |  |
| 43. Women can get infected more easily with HIV than men?                                          |  |
| 44. Drugs against HIV have always very serious side effects?                                       |  |
| 45. HIV can be spread by using the same toilet?                                                    |  |
| 46. Stigmatisation is not a problem regarding HIV / AIDS?                                          |  |
| 56. Being faithful to one uninfected partner and using condoms is the best protection against HIV? |  |
| 49. HIV stands for "Human Immunodeficiency Virus"?                                                 |  |
| 50. More people with HIV are living in the South W. Region than in the Far North?                  |  |
| 51. In Africa, HIV is most often spread through heterosexual contacts?                             |  |
| 52. Education is the most important way to prevent the spread of HIV?                              |  |
| 53. HIV can be spread through contact of blood?                                                    |  |
| 54. Weight loss, fever and loss of power can be signs of a HIV infection?                          |  |
| 55. Stigmatisation might prevent people from taking their HIV medication?                          |  |

**OPEN Questions:**

- 56. What is the difference between HIV and AIDS, how does one get infected?
- 57. What is Stigma? What is Discrimination?
- 58. Give three ways by which stigma can be reduced?
- 59. What did you like about our Project?
- 60. What did you not like about our Project?
- 61. What should we do to improve the Project?

***Please write answers on the back of the page***
